# Supplementary material
Source: MDPI journal article supplement (https://www.mdpi.com/2311-7524/9/5/583)
Supplement: s1 [file s1]

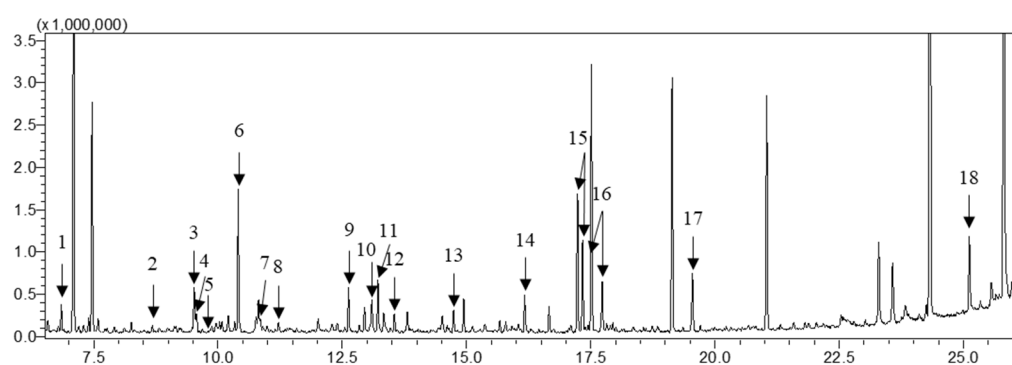

**Figure S1.** Standard chromatograms analyzed using GC/MS. 1, alanine; 2, valine; 3, phosphoric acid; 4, glycerol; 5, isoleucine; 6, glyceric acid; 7, serine; 8, threonine; 9, malic acid; 10, oxoproline; 11, 4-aminobutanoic acid; 12, threonic acid; 13, lyxose; 14, glutamine; 15, fructose; 16, glucose; 17, myo-inositol; 18, maltose.

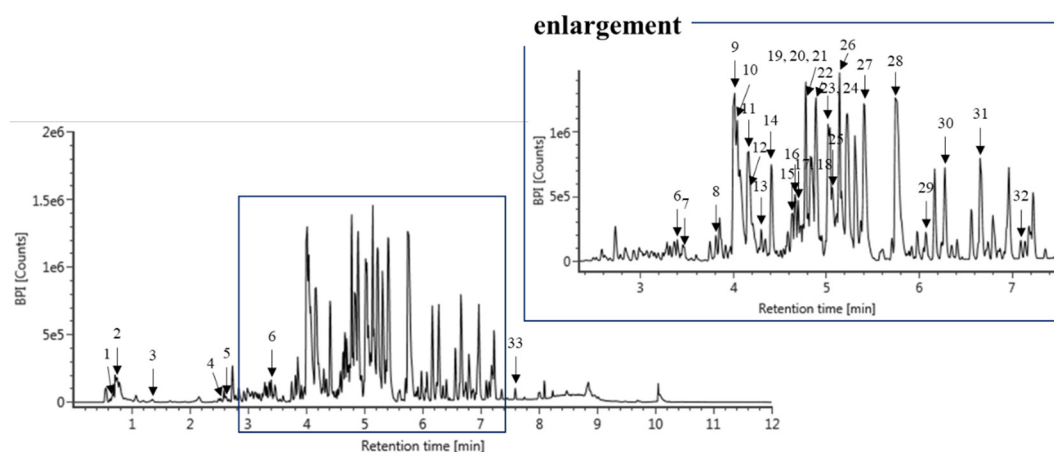

**Figure S2.** Standard chromatogram analyzed using UPLC/Q-TOF-MS. 1, gluconic acid / heonic acid / idonic acid / mannonic acid; 2, maltose / cellobiose / lactose; 3, uridine; 4, phenylalanine; 5, Gentisic acid 5-O-I-glucoside; 6, Kaempferol 3-O-gentiobioside / rutin / Sophoraflavonolside; 7, coumaroylquinic acid; 8, Notoginsenoside R1; 9, Ginsenoside Re; 10, ginsenoside Rg1; 11, Malonyl-Ginsenoside Re; 12, Malonyl-Ginsenoside Rg1; 13, Atractyloside A; 14, 20-glu-Ginsenoside Rf; 15, ginsenoside Rb1; 16, Malonyl-Rb1; 17, ginsenoside Rf; 18, Malonyl-ginsenoside Ra1/Ra2; 19, Malonyl-Ginsenoside Rc; 20, ginsenoside Rb2; 21, Ginsenoside F5; 22, Ginsenoside Rg2; 23, ginsenoside Rd1+Na; 24, ginsenoside Rd1; 25, Malonyl-ginsenoside Rd; 26, ginsenoside F1; 27, ginsenoside Rd2; 28, ginsenoside F2; 29, ginsenoside Rg3; 30, Gingerglycolipid A; 31, Gingerglycolipid B; 32, 9(10)-EpODE / 12(13)-EpODE; 33, Tetradecyl b-D-maltopyranoside.

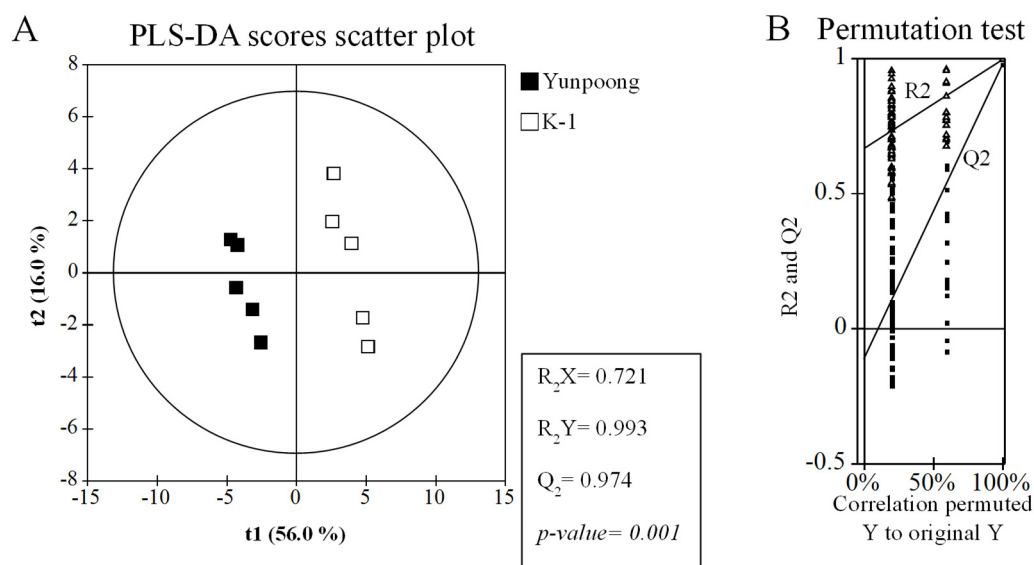

**Figure S3.** Partial least-squares discriminant analysis and Permutation in ‘Yunpoong’ and ‘K-1’ of primary metabolites. Metabolites were analyzed using GC-MS. The qualification of the PLS-DA model was evaluated using  $R^2X$ ,  $R^2Y$ ,  $Q^2$ , and  $p$ -value and validated using cross-validation with a permutation test ( $n = 5$ ).

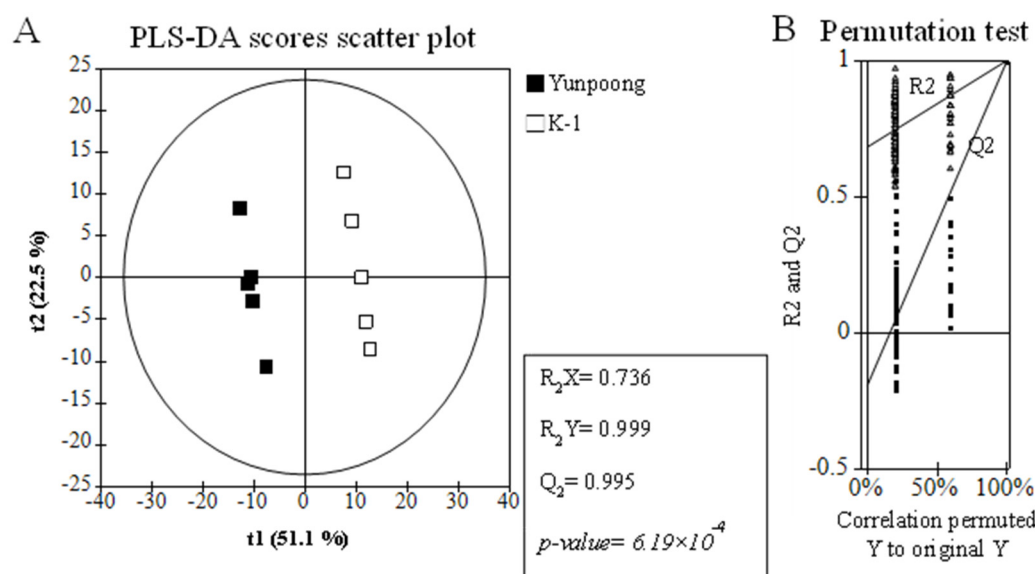

**Figure S4.** Partial least-squares discriminant analysis and Permutation in ‘Yunpoong’ and ‘K-1’ of secondary metabolites. Metabolites were analyzed using UPLC/Q-TOF-MS. The qualification of the PLS-DA model was evaluated using  $R^2_X$ ,  $R^2_Y$ ,  $Q^2$ , and  $p$ -value and validated using cross-validation with a permutation test ( $n = 5$ ).

**Table S1.** Identification of significant primary metabolites contributing to the separation among sample groups.

| No. | RT (min)    | Compound             | RI <sup>(a)</sup> | VIP  | <i>p</i> -value |
|-----|-------------|----------------------|-------------------|------|-----------------|
| 1   | 6.84        | alanine              | 1090              | 1.03 | 0.015           |
| 2   | 8.68        | valine               | 1202              | 1.21 | 4.37E-04        |
| 3   | 9.52        | phosphoric acid      | 1256              | 1.18 | 8.78E-04        |
| 4   | 9.56        | glycerol             | 1259              | 1.12 | 3.16E-03        |
| 5   | 9.88        | isoleucine           | 1279              | 1.10 | 4.10E-03        |
| 6   | 10.40       | glyceric acid        | 1314              | 1.33 | 2.40E-07        |
| 7   | 10.85       | serine               | 1344              | 1.01 | 0.020           |
| 8   | 11.22       | threonine            | 1368              | 0.86 | 0.049           |
| 9   | 12.63       | malic acid           | 1467              | 1.27 | 1.22E-03        |
| 10  | 13.09       | oxoproline           | 1500              | 1.01 | 0.014           |
| 11  | 13.21       | 4-aminobutanoic acid | 1510              | 1.22 | 3.77E-04        |
| 12  | 13.55       | threonic acid        | 1536              | 1.31 | 4.04E-04        |
| 13  | 14.74       | lyxose               | 1634              | 1.34 | 1.74E-08        |
| 14  | 16.17       | glutamine            | 1755              | 1.10 | 4.20E-03        |
| 15  | 17.23/17.33 | fructose             | 1849              | 1.24 | 2.01E-04        |
| 16  | 17.51/17.73 | glucose              | 1875              | 1.35 | 2.82E-09        |
| 17  | 19.55       | myo-inositol         | 2070              | 1.22 | 3.65E-04        |
| 18  | 25.12       | maltose              | 2710              | 1.04 | 9.84E-03        |

**Table S2.** Identification of major secondary metabolites contributing to the separation among sample groups.

| No. | RT (min) | Compound                                                      | m/z       | Adduct              | MS Fragments               | VIP  | p-value  |
|-----|----------|---------------------------------------------------------------|-----------|---------------------|----------------------------|------|----------|
| 1   | 0.69     | gluconic acid / heonic acid / idonic acid / mannonic acid     | 195.0392  | [M-H] <sup>-</sup>  | 75, 165                    | 1.37 | 1.49E-06 |
| 2   | 0.72     | maltose / cellobiose / lactose                                | 341.1001  | [M-H] <sup>-</sup>  | 89, 105, 161, 179, 281     | 1.38 | 5.53E-07 |
| 3   | 1.40     | uridine                                                       | 243.0517  | [M-H] <sup>-</sup>  | 200                        | 1.26 | 4.23E-04 |
| 4   | 2.53     | phenylalanine                                                 | 164.0594  | [M-H] <sup>-</sup>  | 147                        | 1.26 | 5.31E-04 |
| 5   | 2.63     | Gentisic acid 5-O-I-glucoside                                 | 315.0628  | [M-H] <sup>-</sup>  | 71, 108, 152               | 1.39 | 1.20E-05 |
| 6   | 3.37     | Kaempferol 3-O-gentiobioside / rutin /<br>Sophoraflavonolside | 609.1482  | [M-H] <sup>-</sup>  | 89, 173, 191               | 1.41 | 2.11E-11 |
| 7   | 3.45     | coumaroylquinic acid                                          | 337.0845  | [M-H] <sup>-</sup>  | 163, 191                   | 1.41 | 3.07E-11 |
| 8   | 3.82     | Notoginsenoside R1                                            | 977.5509  | [M+Na] <sup>-</sup> | 475, 637, 783, 799         | 0.86 | 0.086    |
| 9   | 3.99     | Ginsenoside Re                                                | 991.5670  | [M+Na] <sup>-</sup> | 475, 619, 783              | 0.73 | 0.126    |
| 10  | 4.01     | ginsenoside Rg1                                               | 845.5022  | [M+Na] <sup>-</sup> | 637, 799                   | 0.30 | 0.977    |
| 11  | 4.14     | Malonyl-Ginsenoside Re                                        | 1031.5648 | [M+Na] <sup>-</sup> | 475, 637, 783, 927, 945    | 1.19 | 2.29E-03 |
| 12  | 4.17     | Malonyl-Ginsenoside Rg1                                       | 885.4996  | [M-H] <sup>-</sup>  | 781, 799, 841              | 0.33 | 0.945    |
| 13  | 4.28     | Atractyloside A                                               | 493.2258  | [M+Na] <sup>-</sup> | 161, 225, 251, 315         | 0.99 | 0.027    |
| 14  | 4.38     | 20-glu-Ginsenoside Rf                                         | 1007.5625 | [M+Na] <sup>-</sup> | 475, 637, 799              | 1.35 | 8.64E-06 |
| 15  | 4.61     | ginsenoside Rb1                                               | 1153.6286 | [M+Na] <sup>-</sup> | 553, 783, 945              | 0.36 | 0.775    |
| 16  | 4.65     | Malonyl-Rb1                                                   | 1193.6264 | [M-H] <sup>-</sup>  | 783, 945, 1089, 1107, 1149 | 1.11 | 6.98E-03 |
| 17  | 4.67     | ginsenoside Rf                                                | 845.5020  | [M+Na] <sup>-</sup> | 475, 637                   | 1.18 | 2.92E-03 |
| 18  | 4.71     | Malonyl-ginsenoside Ra1/Ra2                                   | 1295.6660 | [M-H] <sup>-</sup>  | 621, 1077, 1191, 1251      | 0.95 | 0.037    |
| 19  | 4.77     | Malonyl-Ginsenoside Rc                                        | 1163.6141 | [M-H] <sup>-</sup>  | 459, 621, 783, 1059, 1120  | 1.17 | 0.004    |
| 20  | 4.78     | ginsenoside Rb2                                               | 1123.6164 | [M+Na] <sup>-</sup> | 538, 783, 945              | 0.85 | 0.088    |
| 21  | 4.78     | Ginsenoside F5                                                | 815.4901  | [M+Na] <sup>-</sup> | 475, 637, 769              | 0.62 | 0.207    |
| 22  | 4.86     | Ginsenoside Rg2                                               | 829.5063  | [M+Na] <sup>-</sup> | 391, 457, 475, 637         | 0.71 | 0.173    |

|    |      |                                |           |                       |                    |      |          |
|----|------|--------------------------------|-----------|-----------------------|--------------------|------|----------|
| 23 | 5.00 | ginsenoside Rd1                | 991.5670  | [M+Na] <sup>-</sup>   | 621, 783           | 0.51 | 0.390    |
| 24 | 5.00 | ginsenoside Rd1                | 945.5635  | [M-H] <sup>-</sup>    | 161, 459, 621, 783 | 0.32 | 0.984    |
| 25 | 5.05 | Malonyl-ginsenoside Rd         | 1031.5638 | [M+HCOO] <sup>-</sup> | 927                | 0.45 | 0.416    |
| 26 | 5.11 | ginsenoside F1                 | 683.4417  | [M+Na] <sup>-</sup>   | 475                | 0.32 | 0.884    |
| 27 | 5.38 | ginsenoside Rd2                | 961.5545  | [M+Na] <sup>-</sup>   | 621, 783           | 1.25 | 5.84E-04 |
| 28 | 5.72 | ginsenoside F2                 | 829.5060  | [M+Na] <sup>-</sup>   | 459, 621           | 1.32 | 5.57E-05 |
| 29 | 6.04 | ginsenoside Rg3                | 829.5067  | [M+Na] <sup>-</sup>   | 459, 621           | 0.74 | 0.154    |
| 30 | 6.25 | Gingerglycolipid A             | 721.3714  | [M+Na] <sup>-</sup>   | 249, 277, 397, 415 | 1.24 | 7.65E-04 |
| 31 | 6.63 | Gingerglycolipid B             | 723.3867  | [M+Na] <sup>-</sup>   | 277, 279, 397, 415 | 1.25 | 6.55E-04 |
| 32 | 7.07 | 9(10)-EpODE / 12(13)-EpODE     | 293.2025  | [M-H] <sup>-</sup>    | 113, 195, 249, 279 | 1.34 | 2.44E-05 |
| 33 | 7.58 | Tetradecyl b-D-maltopyranoside | 537.3277  | [M-H] <sup>-</sup>    | 253, 255, 341, 491 | 1.35 | 1.42E-05 |
